# Supplementary material for: High and selective CO2 adsorption by a phthalocyanine nanoporous polymer
Source: Royal Society of Chemistry journal article supplement (doi:10.1039/c5ta00587f), 2015-01-01
Supplement: c5ta00587f1.pdf [file c5ta00587f1.pdf]

## Supplementary Information

### **High and Selective CO<sub>2</sub> adsorption by a phthalocyanine nanoporous polymer**

Venkata S. Pavan K. Neti,<sup>a</sup> Jun Wang,<sup>b</sup> Shuguang Deng,<sup>b</sup> and Luis Echegoyen\*<sup>a</sup>

<sup>a</sup> Department of Chemistry, University of Texas at El Paso, El Paso, TX 79968, United States

<sup>b</sup> Department of Chemical Engineering, New Mexico State University, Las Cruces, NM, United States

<sup>a</sup>E-mail: echegoyen@utep.edu, Tel/Fax: +1 (915) 747-7573/(915) 747-8807

#### **Contents**

#### **Langmuir model fits and Van't Hoff Plots**

## Langmuir model fits

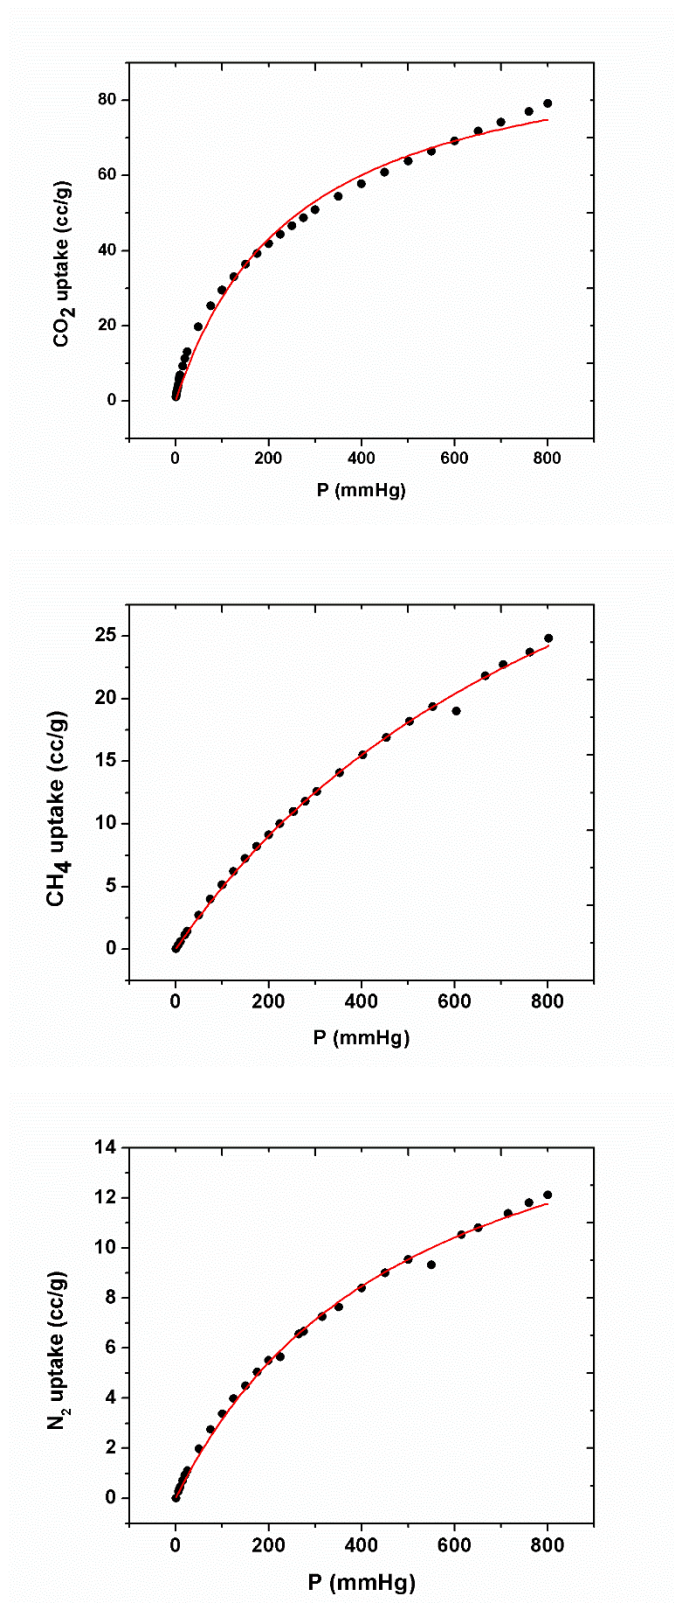

**Figure S1.** Langmuir model fits for CO<sub>2</sub> (top), CH<sub>4</sub> (middle), and N<sub>2</sub> adsorption (bottom) of CPP at 273K.

Henry's constant by the product of Langmuir constants, that is  $K=a*b$ .  $K_1$  (273K) and  $K_2$  (298K),  $\ln K$  vs  $1/T$  (below). Van't Hoff equation is used to get  $Q_{st}$  at zero coverage.

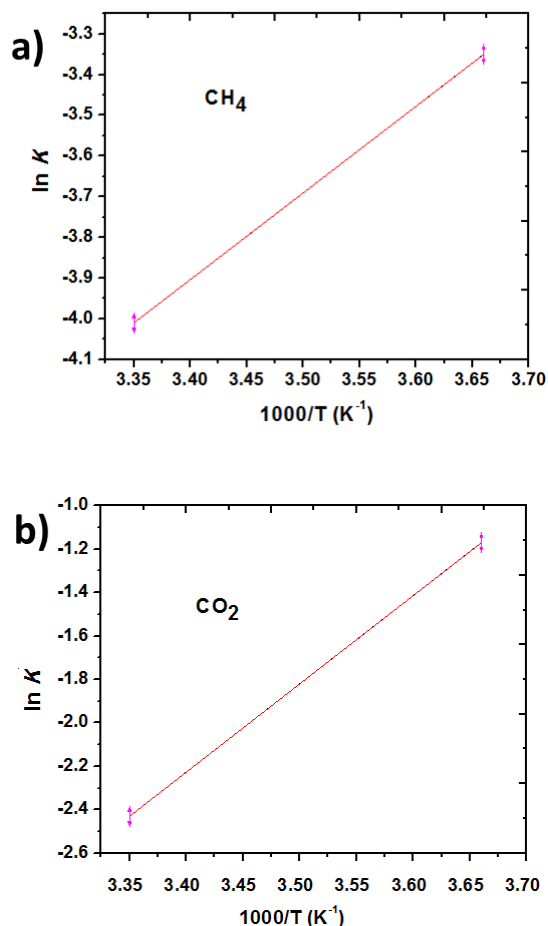

**Figure S2.** Van't Hoff plots of isosteric heat of adsorption for  $CH_4$  (top) and  $CO_2$  (bottom).

### Calculation of isosteric heat of adsorption

The adsorption enthalpy at zero coverage was calculated from Henry's constant using the Van't Hoff equation as

$$\ln K = -\frac{\Delta H}{RT} + \frac{\Delta S}{R}$$

$K$  is the Henry's constant,  $T$  is the temperature, plotting  $\ln K$  vs.  $1000/T$

## Surface Area Measurements

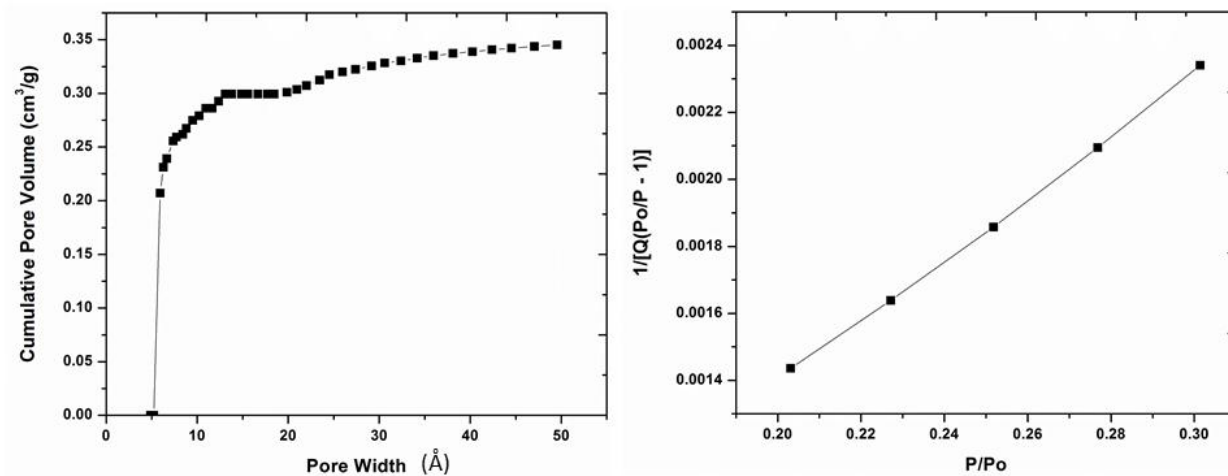

**Figure S3.** Cumulative (left) pore size distribution plot of CPP from the application of the NLDFT model to the N<sub>2</sub> isotherm. BET plot (right) for CPP calculated from isotherm data.
